# Supplementary material for: Charge trapping with α-Fe2O3 nanoparticles accompanied by human hair towards an enriched triboelectric series and a sustainable circular bioeconomy
Source: Royal Society of Chemistry journal article supplement (doi:10.1039/d1mh00919b), 2021-01-01
Supplement: d1mh00919b1.pdf [file d1mh00919b1.pdf]

## Supplementary Information for

# **Charge trapping with $\alpha$ -Fe<sub>2</sub>O<sub>3</sub> nanoparticles accompanied by human hair towards an enriched triboelectric series and a sustainable circular bioeconomy**

Ishita Chakraborty<sup>1</sup>, Sz-Nian Lai<sup>2</sup>, Ming-Chung Wu<sup>3,4,5</sup>, Hsun-Yen Lin,<sup>2</sup> Chuan Li<sup>6</sup>, Jyh Ming Wu<sup>2,7,\*</sup> and Chao-Sung Lai<sup>1,8,9,10,\*</sup>

1. Department of Electronic Engineering, Chang Gung University, Taoyuan, Taiwan.
2. Department of Materials Science and Engineering, National Tsing Hua University, Hsinchu, Taiwan.
3. Department of Chemical and Materials Engineering, Chang Gung University, Taoyuan, Taiwan.
4. Green Technology Research Center, Chang Gung University, Taoyuan, Taiwan.
5. Division of Neonatology, Department of Pediatrics, Chang Gung Memorial Hospital, Taoyuan, Taiwan.
6. Department of Biomedical Engineering, National Yang Ming Chiao Tung University, Taipei, Taiwan.
7. High Entropy Materials Center, National Tsing Hua University, Hsinchu, Taiwan.
8. Department of Nephrology, Chang Gung Memorial Hospital, Taoyuan, Taiwan.
9. Department of Materials Engineering, Ming-Chi University of Technology, New Taipei City, Taiwan.
10. Artificial Intelligent Innovation Research Center, Chang Gung University, Taoyuan, Taiwan.

\* *Authors to whom correspondence should be addressed.* E-mail address : [wujm@mx.nthu.edu.tw](mailto:wujm@mx.nthu.edu.tw) (Jyh Ming Wu) and [cslai@mail.cgu.edu.tw](mailto:cslai@mail.cgu.edu.tw) (Chao-Sung Lai)

**This supplementary file includes:**

Figures S1 to S12

Table S1

|                 |                                                                                                                                                                                                                             |    |
|-----------------|-----------------------------------------------------------------------------------------------------------------------------------------------------------------------------------------------------------------------------|----|
| <b>Fig. S1</b>  | Schematic diagram of the process for fabricating the TENG based on the PDMS@ $\alpha$ -Fe <sub>2</sub> O <sub>3</sub> NP composite film and human hair-based film along with the respective photographs.                    | 4  |
| <b>Fig. S2</b>  | FESEM images of the $\alpha$ -Fe <sub>2</sub> O <sub>3</sub> NPs, PDMS@ $\alpha$ -Fe <sub>2</sub> O <sub>3</sub> NP composites and human hair-based film.                                                                   | 5  |
| <b>Fig. S3</b>  | EDS spectra of the PDMS film, $\alpha$ -Fe <sub>2</sub> O <sub>3</sub> NPs and PDMS@ $\alpha$ -Fe <sub>2</sub> O <sub>3</sub> NP composite film.                                                                            | 6  |
| <b>Fig. S4</b>  | EDS spectra of the different shaded regions of human hair-based film.                                                                                                                                                       | 6  |
| <b>Fig. S5</b>  | AFM images (three-dimensional) of the Al film and PDMS@ $\alpha$ -Fe <sub>2</sub> O <sub>3</sub> NP composites with different $\alpha$ -Fe <sub>2</sub> O <sub>3</sub> NPs content.                                         | 7  |
| <b>Fig. S6</b>  | Surface potential and corresponding work function of the PDMS@ $\alpha$ -Fe <sub>2</sub> O <sub>3</sub> NP composites with different $\alpha$ -Fe <sub>2</sub> O <sub>3</sub> NPs content.                                  | 8  |
| <b>Fig. S7</b>  | Outputs of TENG based on PDMS (as negative electrification layers) and Al film (as the positive electrification layer).                                                                                                     | 9  |
| <b>Fig. S8</b>  | Output of TENGs based on $\alpha$ -Fe <sub>2</sub> O <sub>3</sub> NPs (as negative electrification layers) with Al film and human hair-based film separately (both as the positive electrification layer).                  | 9  |
| <b>Fig. S9</b>  | Output of TENGs with PTFE and PDMS@ $\alpha$ -Fe <sub>2</sub> O <sub>3</sub> NP film as negative electrification layers accompanied by human hair-based film (as the positive electrification layer).                       | 10 |
| <b>Fig. S10</b> | Outputs of PF <sub>2</sub> based TENGs with human hair and Al as positive electrification layers separately.                                                                                                                | 10 |
| <b>Fig. S11</b> | Outputs of PF <sub>2</sub> based TENGs with treated and untreated human hair as positive electrification layers separately.                                                                                                 | 11 |
| <b>Fig. S12</b> | Working mechanism of the PDMS@ $\alpha$ -Fe <sub>2</sub> O <sub>3</sub> NP film (as the negative electrification layer) and human hair (as the positive electrification layer) based TENG at different stages of operation. | 12 |
| <b>Table S1</b> | Morphology Data of PDMS film and PDMS@ $\alpha$ -Fe <sub>2</sub> O <sub>3</sub> NP composite films.                                                                                                                         | 13 |

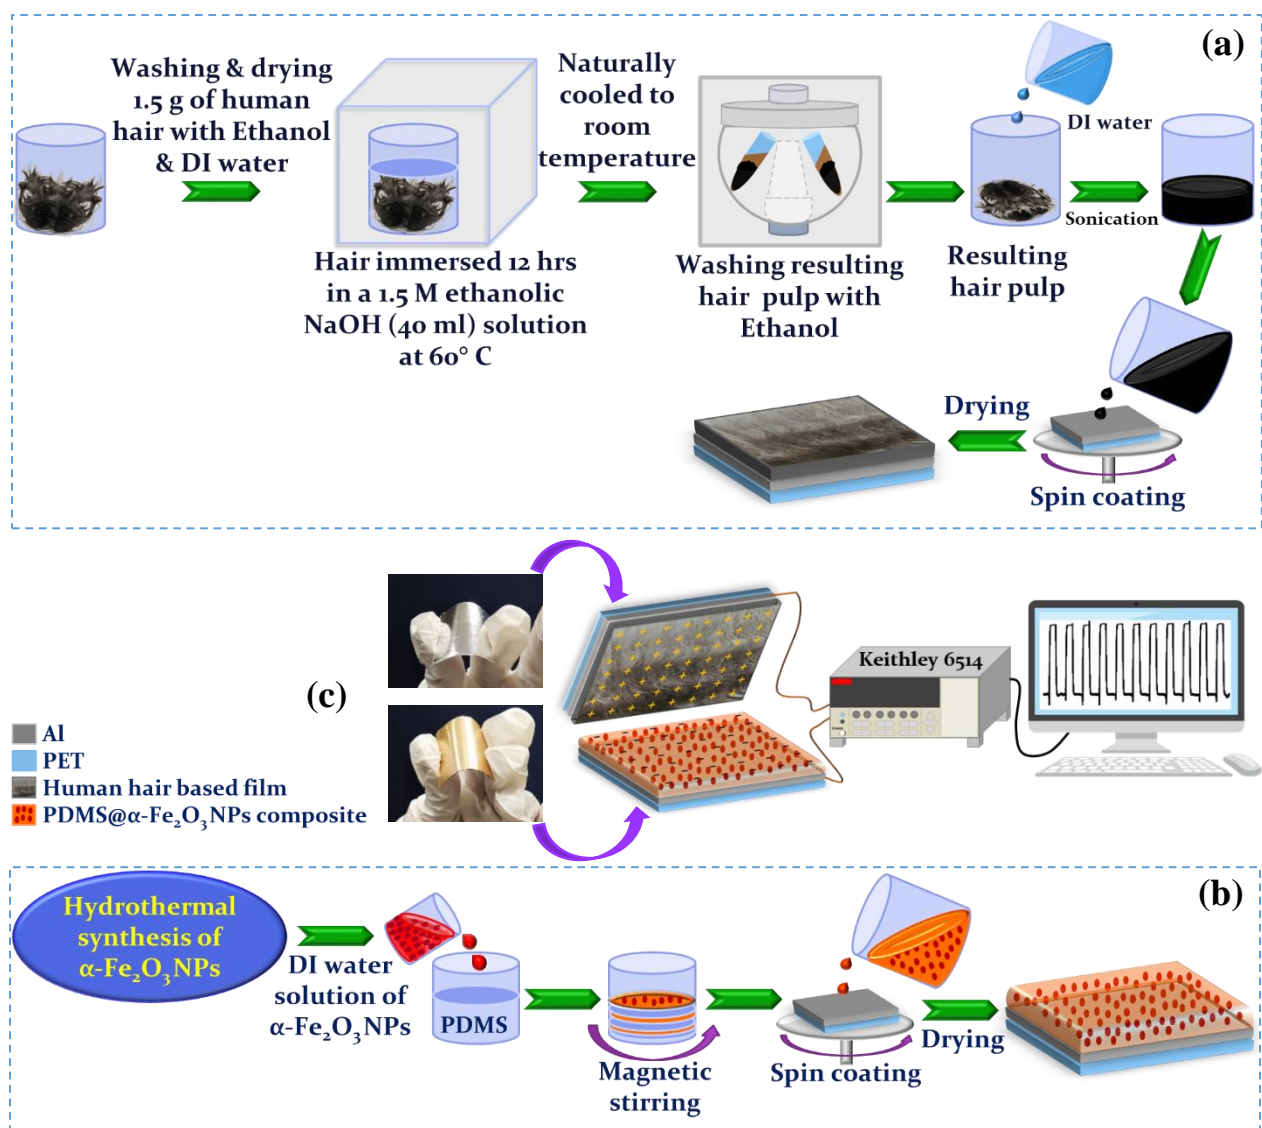

**Fig S1.** Schematic diagram of the process for fabricating (a) the human hair-based film over PET/Al as positive side of TENG and (b) the PDMS@ $\alpha$ -Fe<sub>2</sub>O<sub>3</sub> NP film over PET/Al as the negative side of TENG, (c) Schematic description for the TENG based on the PDMS@ $\alpha$ -Fe<sub>2</sub>O<sub>3</sub> NP composite film and human hair-based film along with the respective photographs.

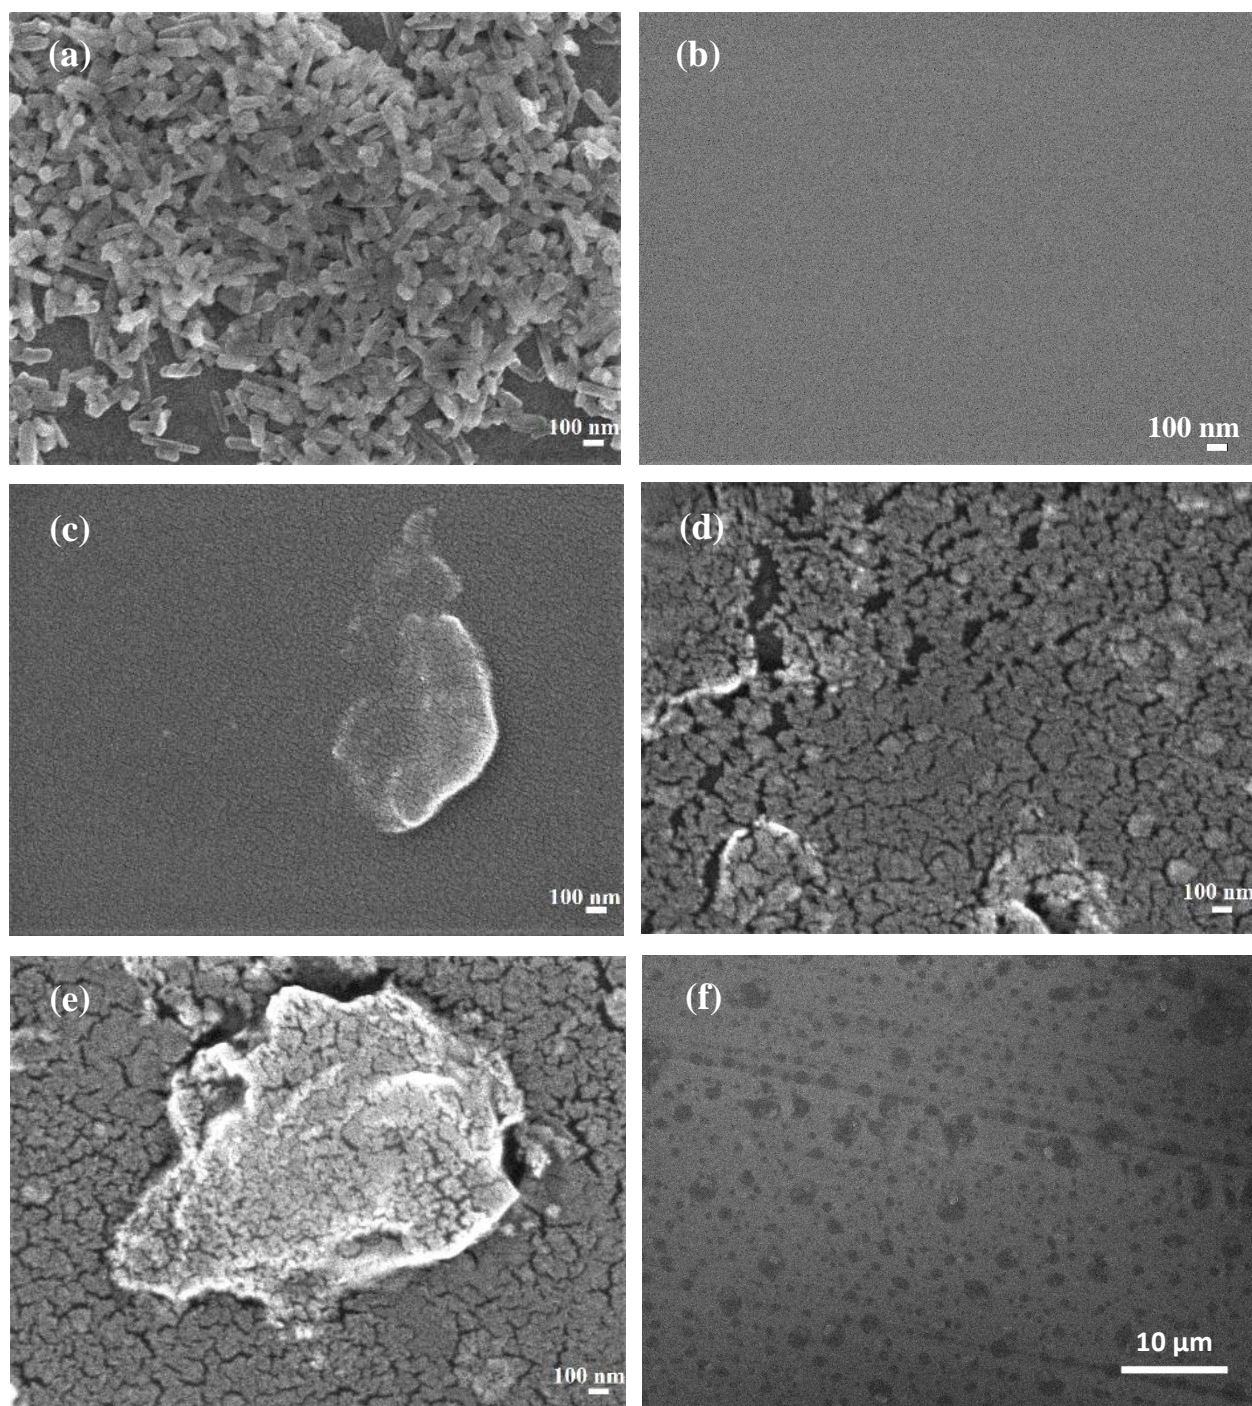

**Fig S2.** FESEM images of the (a)  $\alpha$ -Fe<sub>2</sub>O<sub>3</sub> NPs and PDMS@ $\alpha$ -Fe<sub>2</sub>O<sub>3</sub> NP composite with (b) 0, (c) 0.036, (d) 0.077, (e) 0.09 wt.%  $\alpha$ -Fe<sub>2</sub>O<sub>3</sub> NPs contents. (f) FESEM image of human hair-based film.

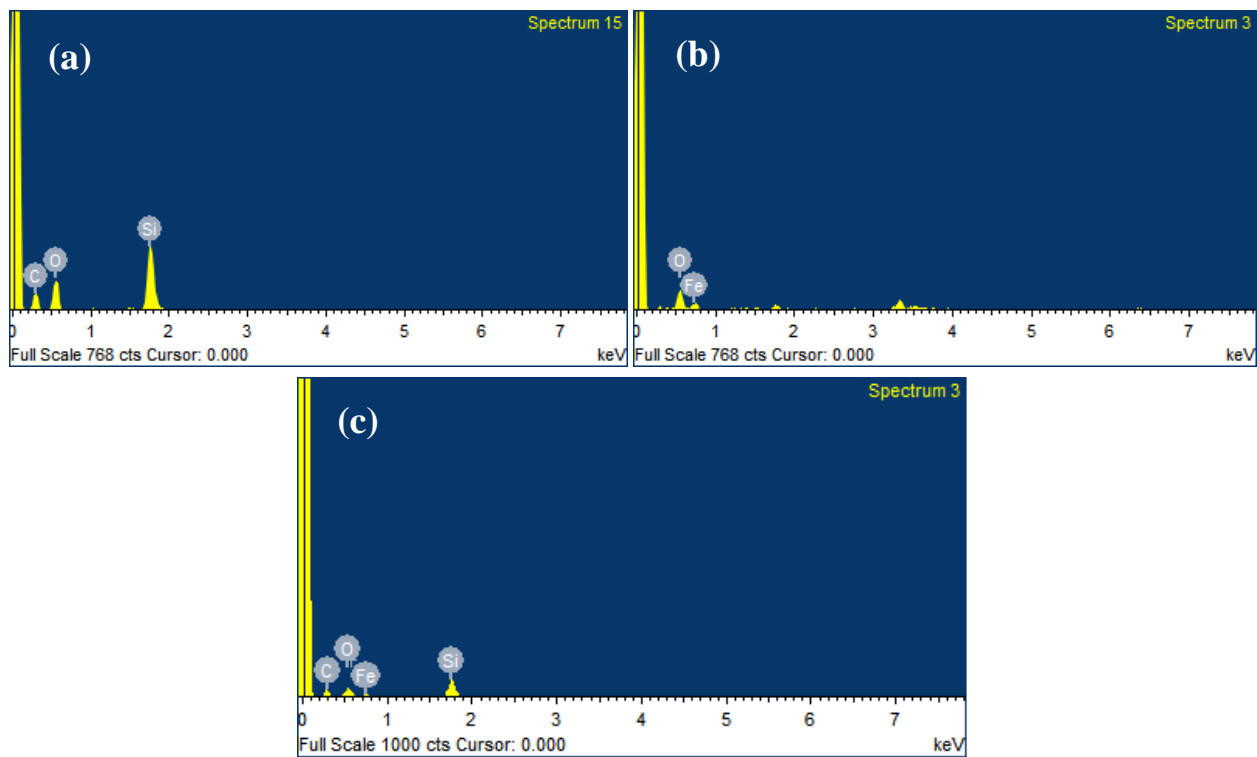

**Fig S3.** EDS spectra of the (a) PDMS film (b)  $\alpha$ -Fe<sub>2</sub>O<sub>3</sub> NPs and (c) PF<sub>2</sub> film.

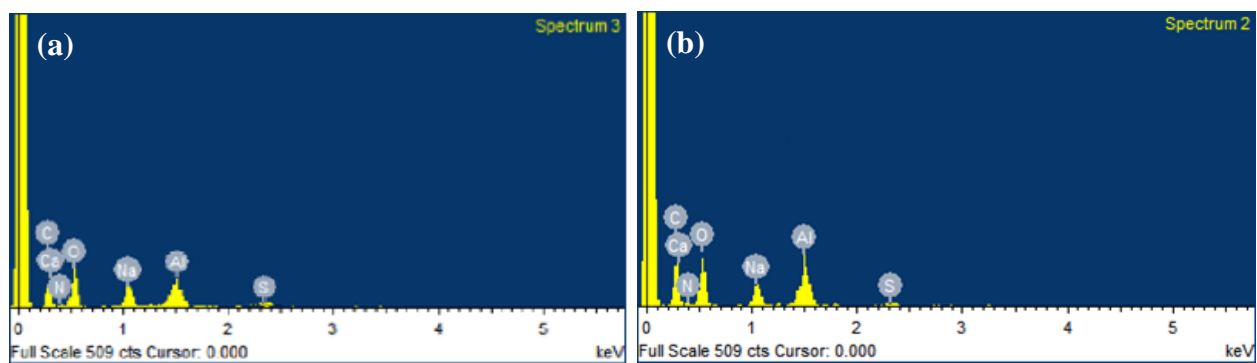

**Fig S4.** EDS spectra of the (c) dark shaded region, (d) light shaded region in FESEM images of human hair-based film.

$R_q = 8.89 \text{ nm}$ ,  $R_a = 6.91 \text{ nm}$

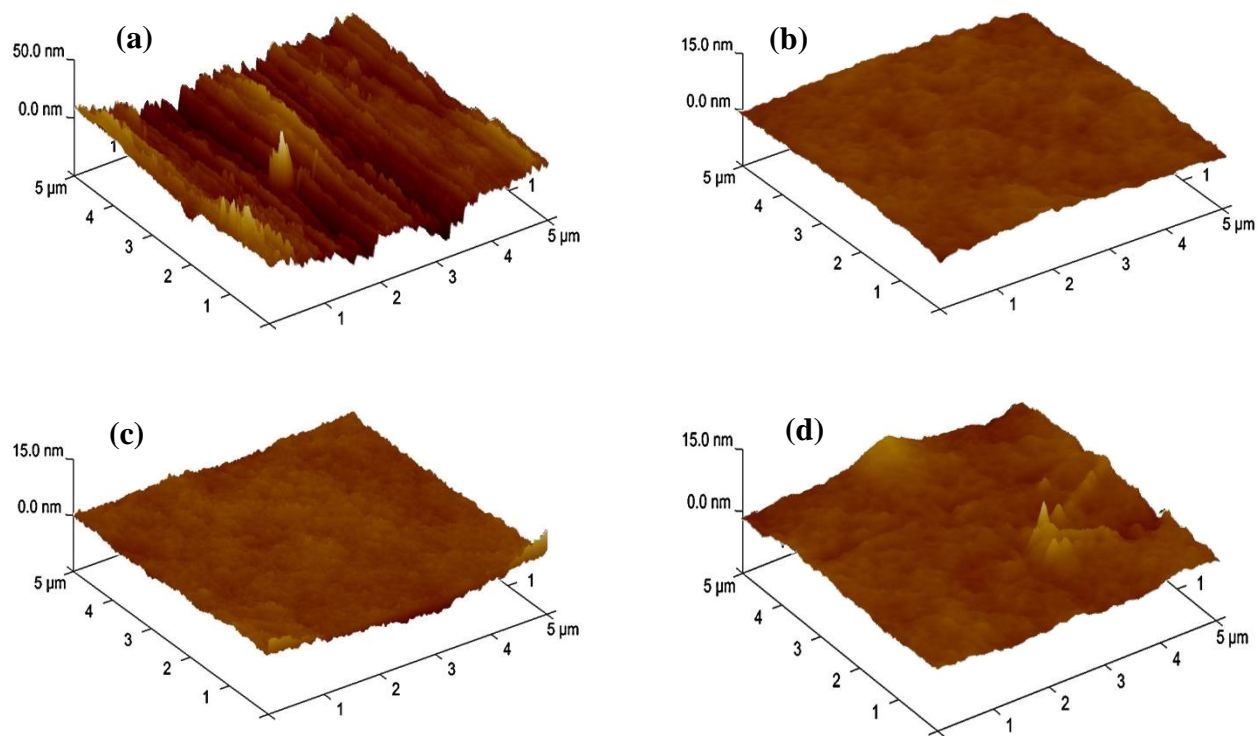

**Fig S5.** AFM images (three-dimensional) of (a) Al film and PDMS@ $\alpha\text{-Fe}_2\text{O}_3$  NP composite with (b) 0.036, (c) 0.077, (d) 0.09 wt.%  $\alpha\text{-Fe}_2\text{O}_3$  NPs content.

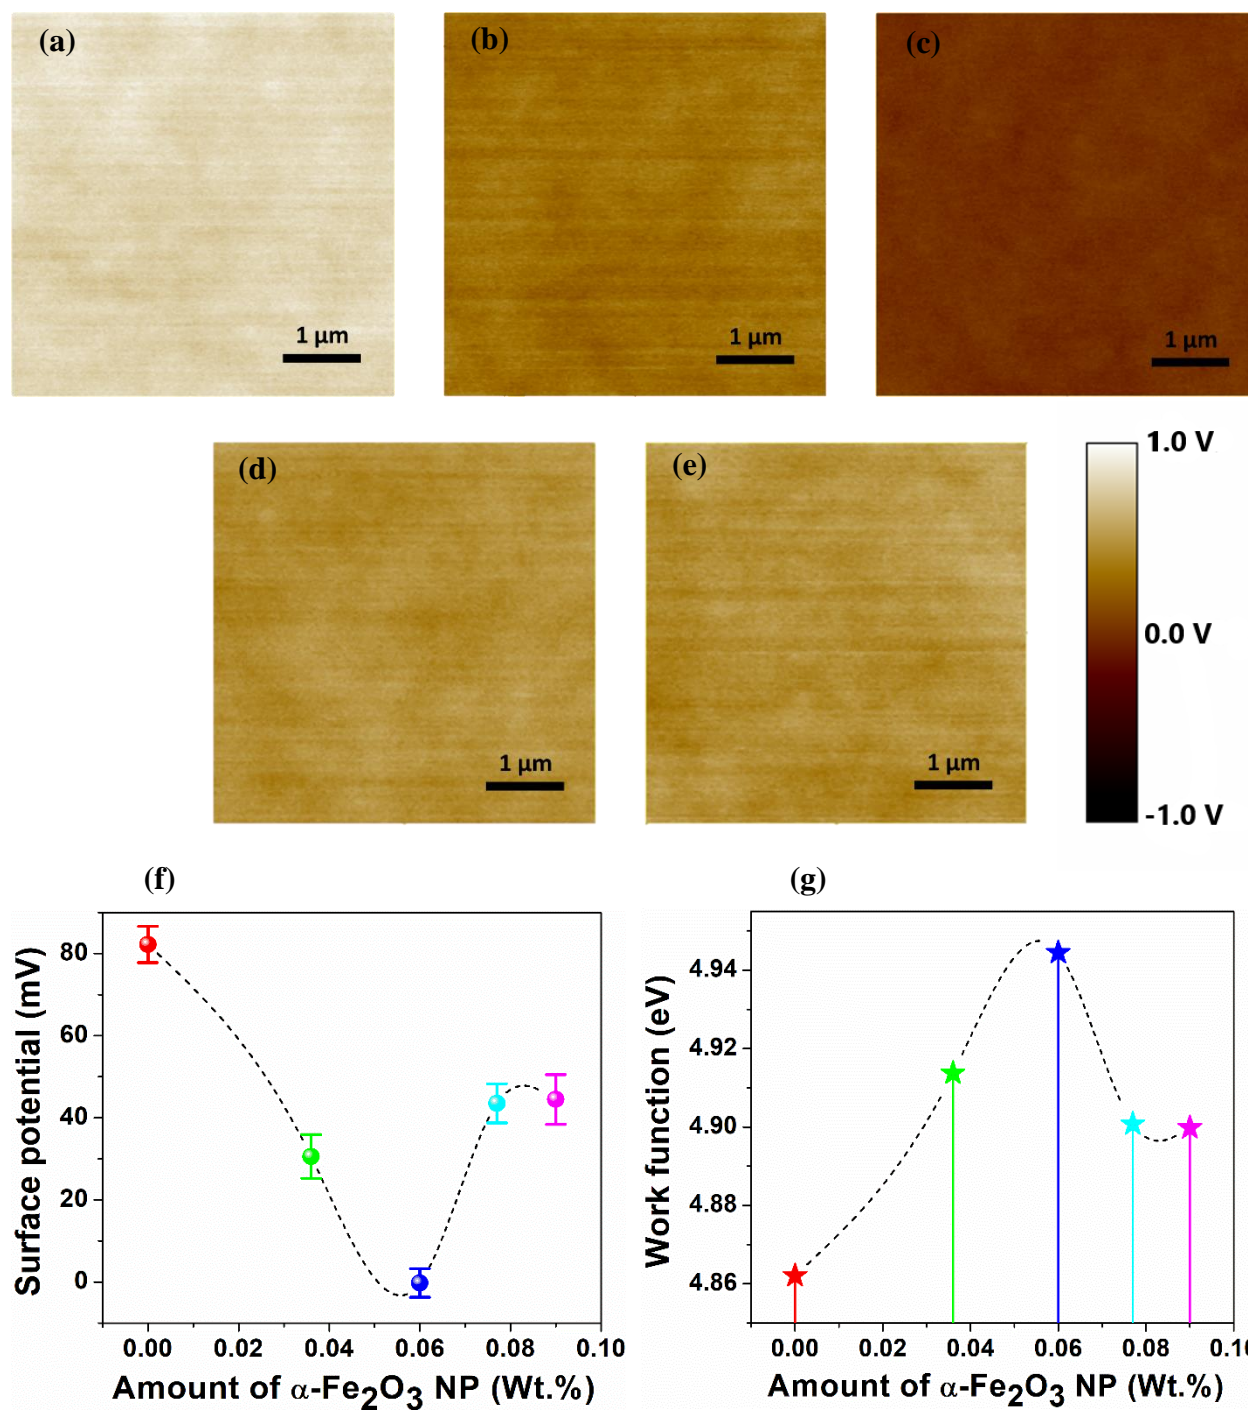

**Fig S6.** Surface potentials of the PDMS@ $\alpha$ -Fe<sub>2</sub>O<sub>3</sub> NP composite with (a) 0, (b) 0.036, (c) 0.06 (d) 0.077, (e) 0.09 wt.%  $\alpha$ -Fe<sub>2</sub>O<sub>3</sub> NPs content. (f) The mean value of surface potential with standard deviation and (g) corresponding work function variation due to the insertion of  $\alpha$ -Fe<sub>2</sub>O<sub>3</sub> NPs into PDMS matrix.



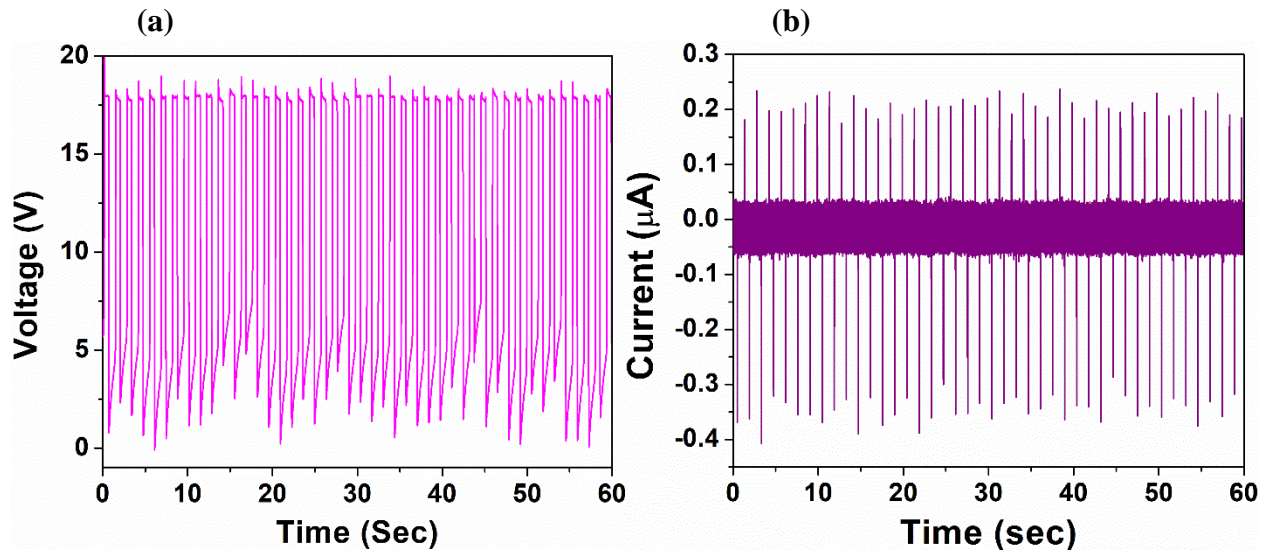

**Fig S7.** (a) Voltage and (b) Current outputs of TENGs with PDMS (as negative electrification layers) and Al film (as the positive electrification layer).

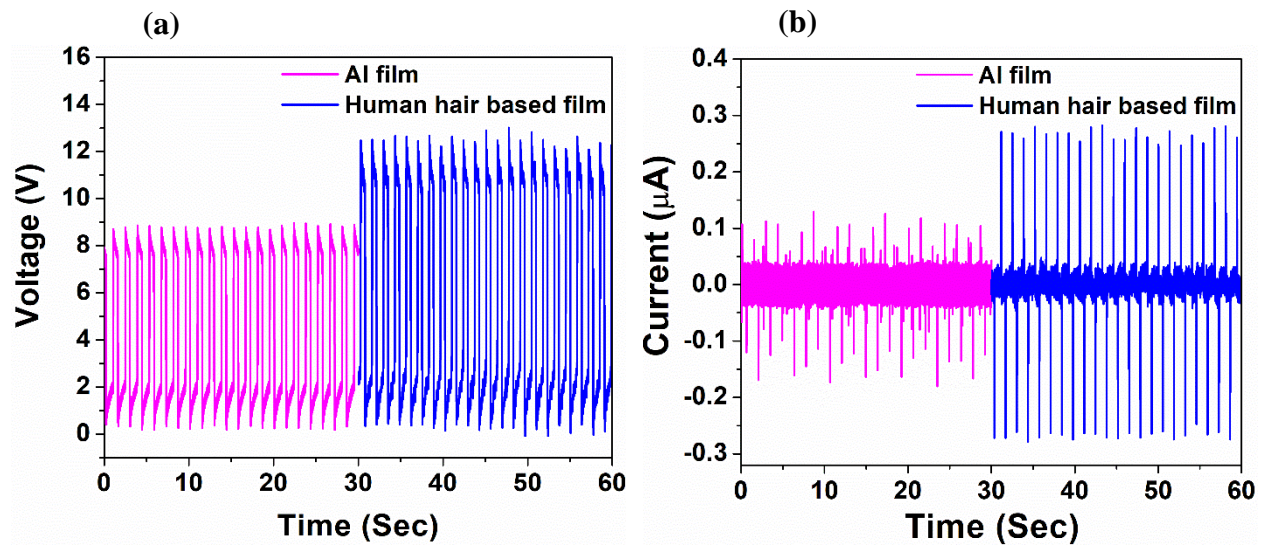

**Fig S8.** (a) Voltage and (b) Current outputs of TENGs based on  $\alpha$ -Fe<sub>2</sub>O<sub>3</sub> NPs (as negative electrification layers) with Al film and human hair-based film separately (both as the positive electrification layer).

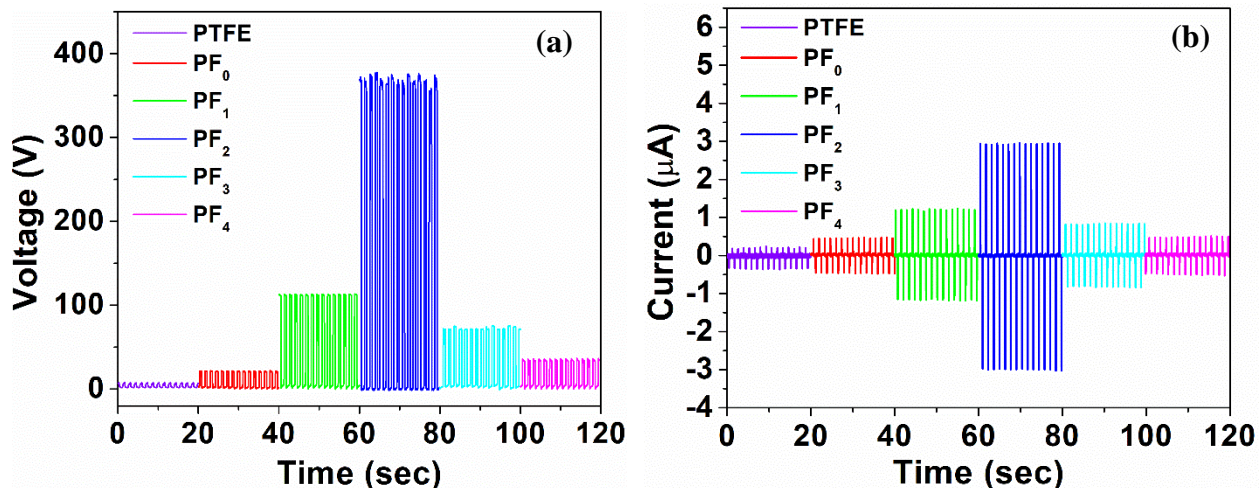

**Fig S9.** (a) Voltage and (b) Current outputs of TENGs with PTFE and PDMS@ $\alpha$ -Fe<sub>2</sub>O<sub>3</sub> NP film as negative electrification layers accompanied by human hair-based film (as the positive electrification layer).

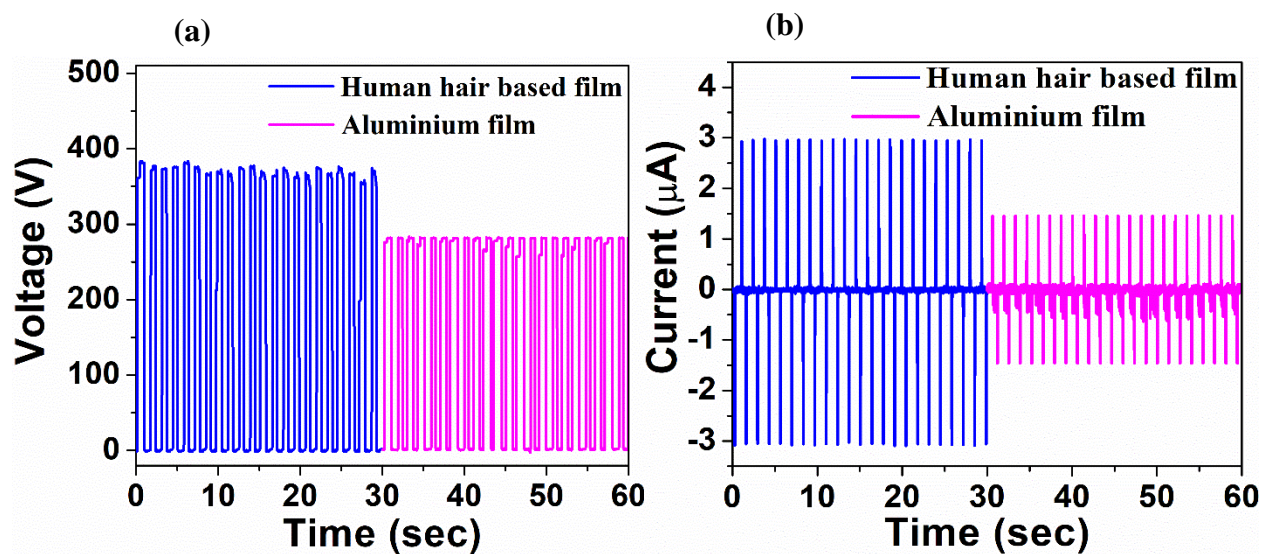

**Fig S10.** (a) Voltage and (b) Current outputs of PF<sub>2</sub> based TENGs with human hair and Al as positive electrification layers separately.

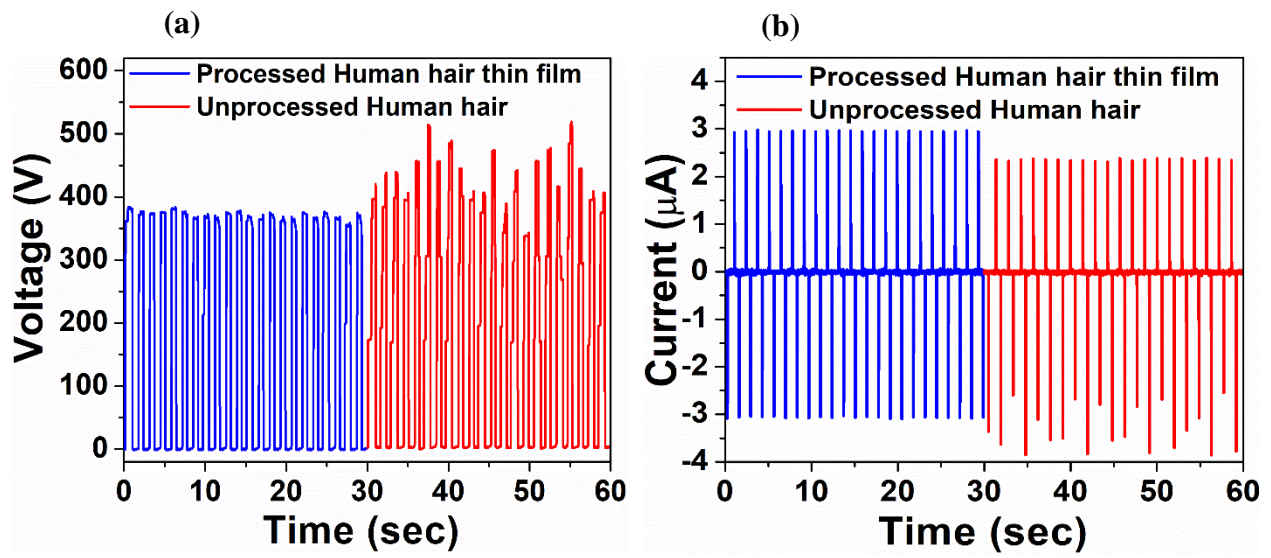

**Fig S11.** (a) Voltage and (b) Current outputs of PF<sub>2</sub> based TENGs with treated and untreated human hair as positive electrification layers separately.

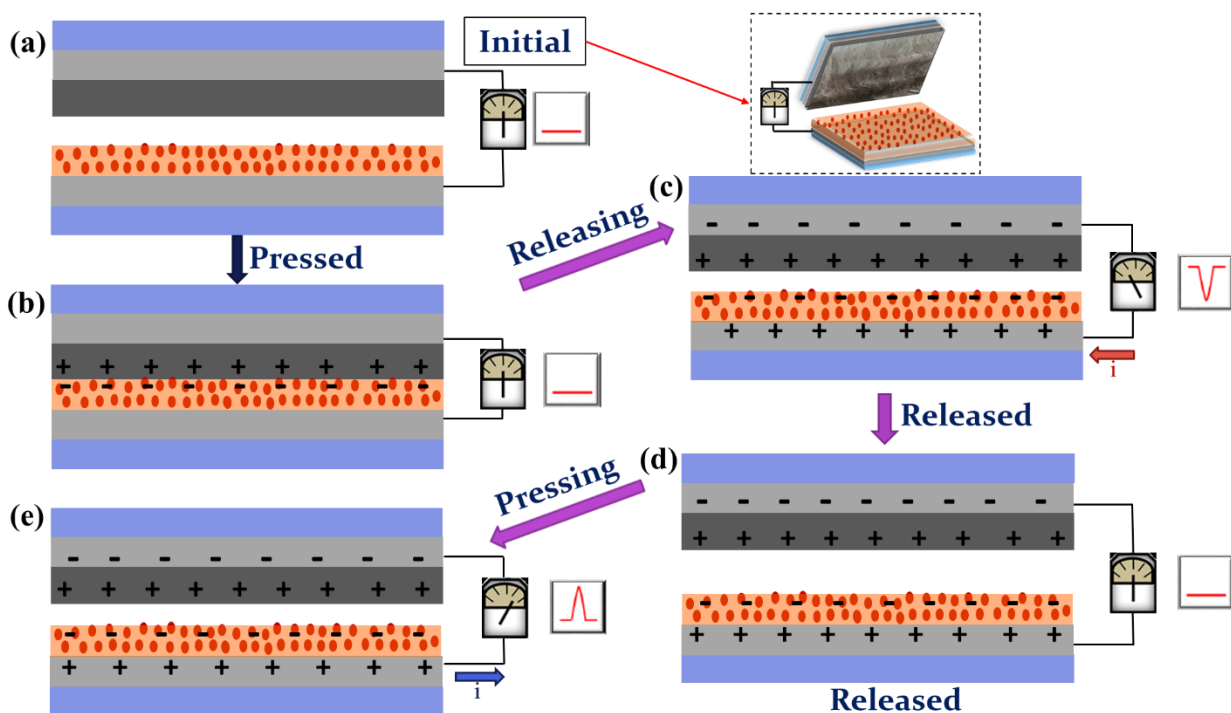

**Fig S12.** Working mechanism of PDMS@ $\alpha$ -Fe<sub>2</sub>O<sub>3</sub> NP film (as the negative electrification layer) and human hair (as the positive electrification layer) based TENG, (a) Initial state of the TENG (b) The first contact, no output signal appears (c) On succeeding releasing, a negative output electric signal is initiated (d) After two layers get completely released, the output drops to zero (e) On subsequent pressing, a positive electric signal is generated.

| <b>Roughness (nm)</b> | <b>PF<sub>0</sub></b> | <b>PF<sub>1</sub></b> | <b>PF<sub>2</sub></b> | <b>PF<sub>3</sub></b> | <b>PF<sub>4</sub></b> |
|-----------------------|-----------------------|-----------------------|-----------------------|-----------------------|-----------------------|
| rms roughness, Rq     | 0.444                 | 0.510                 | 0.543                 | 0.609                 | 0.880                 |
| average roughness, Ra | 0.353                 | 0.405                 | 0.434                 | 0.479                 | 0.626                 |

**Table S1.** Morphology Data of PDMS film and PDMS@ $\alpha$ -Fe<sub>2</sub>O<sub>3</sub> NP composite films.
